# Supplementary material
Source: PubMed Central journal article supplement (PMC3740347)
Supplement: NIHMS497113-supplement-1_si_001.pdf [file NIHMS497113-supplement-1_si_001.pdf]

# Specificity Profiling of Protein Phosphatases toward Phosphoseryl and Phosphothreonyl Peptides

Qing Xiao, Rinrada Luechapanichkul, Yujing Zhai, and Dehua Pei\*

Supporting Information

Table S1. Preferred VH1 Substrates Selected from Library II (XXXXXXZAA) at 100 nM VH1<sup>a</sup>

| Intensely Colored |          | Lightly Colored |        |          |        |
|-------------------|----------|-----------------|--------|----------|--------|
| Class I           |          | Class I         |        | Class II |        |
| DDFEAt            | AIAAFt   | EEYYt           | IIFQAt | DFEYYt   | YEGUYt |
| DEFYgt            | QIAFAt   | EEFGPt          | EYIGgt | EYDFLt   | IEGAGt |
| DDYMHt            | VIMPnt   | YDFAAt          | FGIAMt | EFDQMt   | EYNNnt |
| NEFYpt            | EGPENT   | IDYUNt          | IQUIIt | EFQGGt   | EYNNAt |
| GEFYpt            | PNUFnt   | NEFVNt          | EDVGft | GDNQMt   | INQMLt |
| NEFMAt            | EEYVNt   | NDFGpt          | EUUYnt | EENFAt   |        |
| *EFYUGt           | EFVENT   | IDYMGt          | EIUInt | EFQQDt   |        |
| EFFAGt            |          | ADFMAt          | QPUUFt | EUGDMt   |        |
| EUYUGt            | Class II | DIYYAt          | HUUQQt | YHDFIt   |        |
| EVFIQt            | DFQUAt   | DFYHGt          | KEFEMt | RVDDLt   |        |
| VVFUNt            | ELQFQt   | EAYUNt          | NDFFYt | EFDDGt   |        |
| QQYVNt            | FVDYFt   | EMYMNt          | EYFEAt | VUEUHt   |        |
| VQYVGt            | NYEPPt   | NFYEQt          | EEYFQt | HYEEGt   |        |
| DFVVGt            | DFEUHt   | MNFENt          |        | FNENNt   |        |
| EQIMNt            | MNEYFt   | ILYUQt          |        | MQEQQt   |        |

<sup>a</sup>M, Nle; U, Abu; t, pT; \*, sequences selected for kinetic analysis.

Table S2. Preferred VH1 Substrates Selected from Library II (XXXXXXZAA) at 1 μM VH1<sup>a</sup>

| Class I |        |        | Class II |                    |                    |
|---------|--------|--------|----------|--------------------|--------------------|
| DYFVDt  | EEYFAt | EYMNGt | GNDEFt   | EDEQFt             | HDDDNt             |
| EEFYgt  | DFFDAt | DUIEDt | NEEVGt   | QLEYAt             | ELQGNt             |
| EEYYIt  | ENFENt | AGMEQt | GFEYFt   | MDDAht             | EYNUYt             |
| UEAYDt  | DAYDDt | YDLMHt | LIQMft   | AEEFAt             | DFHNYt             |
| EUIYNt  | EFYYEt | QEMAFt | NIQAFt   | VYEDYt             | NUHNI <sub>s</sub> |
| ADIEFt  | EEYIGt |        | PFQEAt   | IUEAEt             | EYHIDt             |
| EEVLYt  | AQYAGt |        | DYGDYt   | HEEFYt             | HLGYHt             |
| LGVNLt  | EFVENT |        | DIGVNt   | VEEEYt             | VNGUFt             |
| VVUFEt  | NDMYNt |        | QQGYDt   | YEEEDt             | QUGEFt             |
| QQUYGt  | DDVIHt |        | UFHDGt   | GNEYNt             | EUGDMt             |
|         | AFVDGt |        |          | DYDHI <sub>t</sub> | EHGFFt             |
|         | ELLYDt |        |          | EIEYGt             | PDGINt             |
|         | KDVGMt |        |          | PNEYIt             |                    |

<sup>a</sup>M, Nle; U, Abu; t, pT; s, pS.

Table S3. Preferred VH1 Substrates Selected from Libraries Ia and Ib (ZXXXXXAA)<sup>a</sup>

| Library Ia |        |        |        | Library Ib |         |
|------------|--------|--------|--------|------------|---------|
| sDIIIFI    | sFEFFP | sEGFFI | sFMIEN | *tDFIQF    | tIEFIN  |
| sFDIFF     | sLEFAF | sIEDIW | sMFADI | tDIQFI     | tLFEDI  |
| sLDFIW     | sIDIII | sFEFDI | sLGFDF | *tFDIQF    | tFFEHF  |
| sIEIFI     | sAFDFT | sFEIDI | sMIFEN | tFIDIE     | *tFSDFI |
| sVDIFV     | sMFDIV | sIEVQF | sVLFDP | tMFEFE     | tISDFI  |
| sLDIIF     | sVVDFP | sMEIIQ | sIVIEI | tLMEFF     | tILEAI  |
| sVIIDF     | sAFVEF | sIEIIG | sFFGFD | tLMEII     | tSFIDE  |
| sMLIDI     | sIFIEN | sLDVII | sGFIFD | tFFTID     | *tFIADF |
| sLIIDI     | sMLFDF | sIFEDS | sVFIPD | tDEFFI     | tMFIDI  |
| sDFEFF     | sMFSED | sFSDFI | sLFIGD | tDLFEI     | tLMFEP  |
| sEFTEF     | sFIFSE | sFMDVV | sLIFTD | tENFII     | tVTIDF  |
| sDMFEN     | sATFFD | sLFEVN | sAGIFE | tENMWF     | tFFVQE  |
| sEIIIFD    | sIEWIN | sMAEAF |        | tDPLFF     | tFMFIE  |
| sEFTFQ     | sEEFAI | sLMDVT |        | tDVITF     | *tFLIVE |
| sEIFGF     | sDFDFN | sFSFDI |        | tMDDFI     | tGFFIE  |
| sEMFVN     | sELIDI | sFLAEF |        | tMEIDI     | tVFSFD  |
| sDIIAF     | sEVWID | sFMIDN |        | tIDFWI     | tRIIFD  |

<sup>a</sup>M, Nle; ; t, pT; s, pS; \*, sequence selected for kinetic analysis.

Table S4. Preferred VH1 Substrates Selected from Library III (ASXXXXXpYAA)<sup>a</sup>

|         |        |         |        |         |        |
|---------|--------|---------|--------|---------|--------|
| *AQDFDy | ADLYSy | FSNEEy  | LIGDSy | FFNGDy  | PFQEGy |
| SNDFDy  | LEPFSy | IFEENy  | ELWSNy | WANGEy  | FEIDPy |
| TADFdy  | LDMFPy | RFDENy  | IEDSNy | FEAGNy  | ELLDPy |
| SEEWey  | IDAFGy | FPEDNy  | FAFNEy | IHMANY  | AMDSMy |
| VDMFEy  | IGDMDy | MIEDTy  | IDFNdy | QIDDFy  | PEDSMY |
| ELNFEy  | ADWLEy | AIDESy  | MNYSEy | *ADTDFy | DYAQAy |
| AYPFEy  | FDSADy | EFFESy  | FFNNEy | DDLEFy  | FTESPy |
| AQYFDy  | ELWADy | GFFENy  | EYQSDy | MNDDIy  | FEGNGy |
| DDDFQy  | FKWDDy | LGWESy  | FPGNDy | DAPDIy  | EFGGMy |
| DNDFSy  | SLFDEy | *AFGDSy | FEHSEy | ESWDLy  | WEDGAy |
| LNDFQy  | AFAEEy | NYPDSy  | FESSDy | MVFDAy  | LDDPMY |
| DDTFQy  | FVTDDy | PFIDSy  | VMESey | AFEDPy  | EPEMWY |
| *EDAFSy | YLNDdy | FPIDSy  | LDDGEy | ISDDGy  | EDALYy |

<sup>a</sup>M, Nle; Y, F<sub>2</sub>Y; y, pY; \*, sequences selected for kinetic analysis.

Table S5. Preferred VH1 Substrates Selected from Library IV (Alloc-AApYXXXXX)<sup>a</sup>

|        |         |        |         |        |        |
|--------|---------|--------|---------|--------|--------|
| yIVWEE | yDMWLA  | yWEYQI | ySDWFM  | yLFDFT | yNRIDF |
| ySAYEH | yEIFIS  | yDFWQT | yENWWP  | yWIDVY | yDIMAF |
| yFVYDY | yYPPAW  | yQPYTT | yDRWFE  | yWNEIF | yWPNDG |
| yHMYES | yFDWIS  | yEVWNR | yGPYHE  | yDWMVP | yFEQYW |
| yFQWES | yHDWMW  | yHMWTE | *yQWDSF | yDFAYQ | yFEQWA |
| yVYYEI | yPEWMS  | yEIFTW | yTYDQE  | yEWAFa | yDWQEW |
| yEAWLG | yMDWIT  | yDWWAE | yTYDVE  | yEWAwV | yGTTYA |
| yVAWIE | yMDFIS  | yIEWFH | yHWDII  | yWFAME | yPHHWV |
| ySMWID | yIEWSR  | yAIWFI | yEWETW  | yENIwW | yTYGEI |
| yQVWFA | *yIDWTG | yQVWWI | yVYESY  | yNSVFR | yWIGII |

<sup>a</sup>M, Nle; Y, F<sub>2</sub>Y; y, pY; \*, sequences selected for kinetic analysis.

Table S6. Potential VH1 substrates from database search

| Protein     | Phosphorylation Site | Sequence <sup>a</sup> |   |   |   |   |   |   |   |   |   |   |   |   |   |   |
|-------------|----------------------|-----------------------|---|---|---|---|---|---|---|---|---|---|---|---|---|---|
|             |                      | R                     | G | k | s | F | t | L | t | I | t | V | F | T | N | P |
| AML2        | T153                 | R                     | G | k | s | F | t | L | t | I | t | V | F | T | N | P |
| ASK1        | T842                 | C                     | T | E | t | F | T | G | t | L | Q | Y | M | A | P | E |
| BORA        | S252                 | K                     | L | D | t | F | C | G | s | P | P | Y | A | A | P | E |
| Casp2       | S139                 | K                     | I | A | D | F | G | W | s | V | H | A | P | s | s | R |
| CYP3A4      | S116                 | L                     | N | T | S | Y | P | L | s | P | L | S | D | F | A | T |
| ERF         | S251                 | D                     | P | Y | E | F | L | Q | s | P | E | P | A | A | S | A |
| <b>ERK5</b> | T219                 | A                     | E | H | Q | y | F | M | t | E | y | V | A | T | R | W |
| <b>JNK1</b> | T183                 | A                     | G | t | S | F | M | M | t | P | y | V | V | t | R | Y |
| JNK2        | T183                 | A                     | C | T | N | F | M | M | t | P | y | V | V | t | R | Y |
| JNK3        | T221                 | A                     | G | t | S | F | M | M | t | P | y | V | V | t | R | Y |
| MAD1L1      | S29                  | D                     | S | L | S | Y | y | H | s | P | A | D | S | F | S | S |
| MARCKS      | S118                 | I                     | P | N | G | F | G | T | s | P | L | t | P | S | A | R |
| Myf-5       | S133                 | K                     | K | L | E | F | S | S | s | P | D | S | L | S | T | I |
| NCAPG       | T308                 | L                     | N | A | L | F | S | I | t | P | L | S | E | L | V | G |
| PASK        | T1165                | L                     | F | Y | t | F | C | G | t | I | E | Y | C | A | P | E |
| SREBP-1     | S439                 | K                     | L | D | t | F | C | G | s | P | P | Y | A | A | P | E |
| TARDBP      | S404                 | T                     | P | D | G | F | s | C | s | s | s | L | s | A | L | s |
| TDP1        | S563                 | D                     | G | T | E | F | G | G | s | I | y | Q | k | V | N | K |

<sup>a</sup>The pS/pT residue is shown in boldfaced, lower-case letters.
